# Supplementary material for: Inhibition of Rho-Kinase Downregulates Th17 Cells and Ameliorates Hepatic Fibrosis by Schistosoma japonicum Infection
Source: PubMed Central journal article supplement (PMC6829618; doi:10.3390/cells8101262), 2019-10-16
Supplement: cells-08-01262-s001.pdf [file cells-08-01262-s001.pdf]

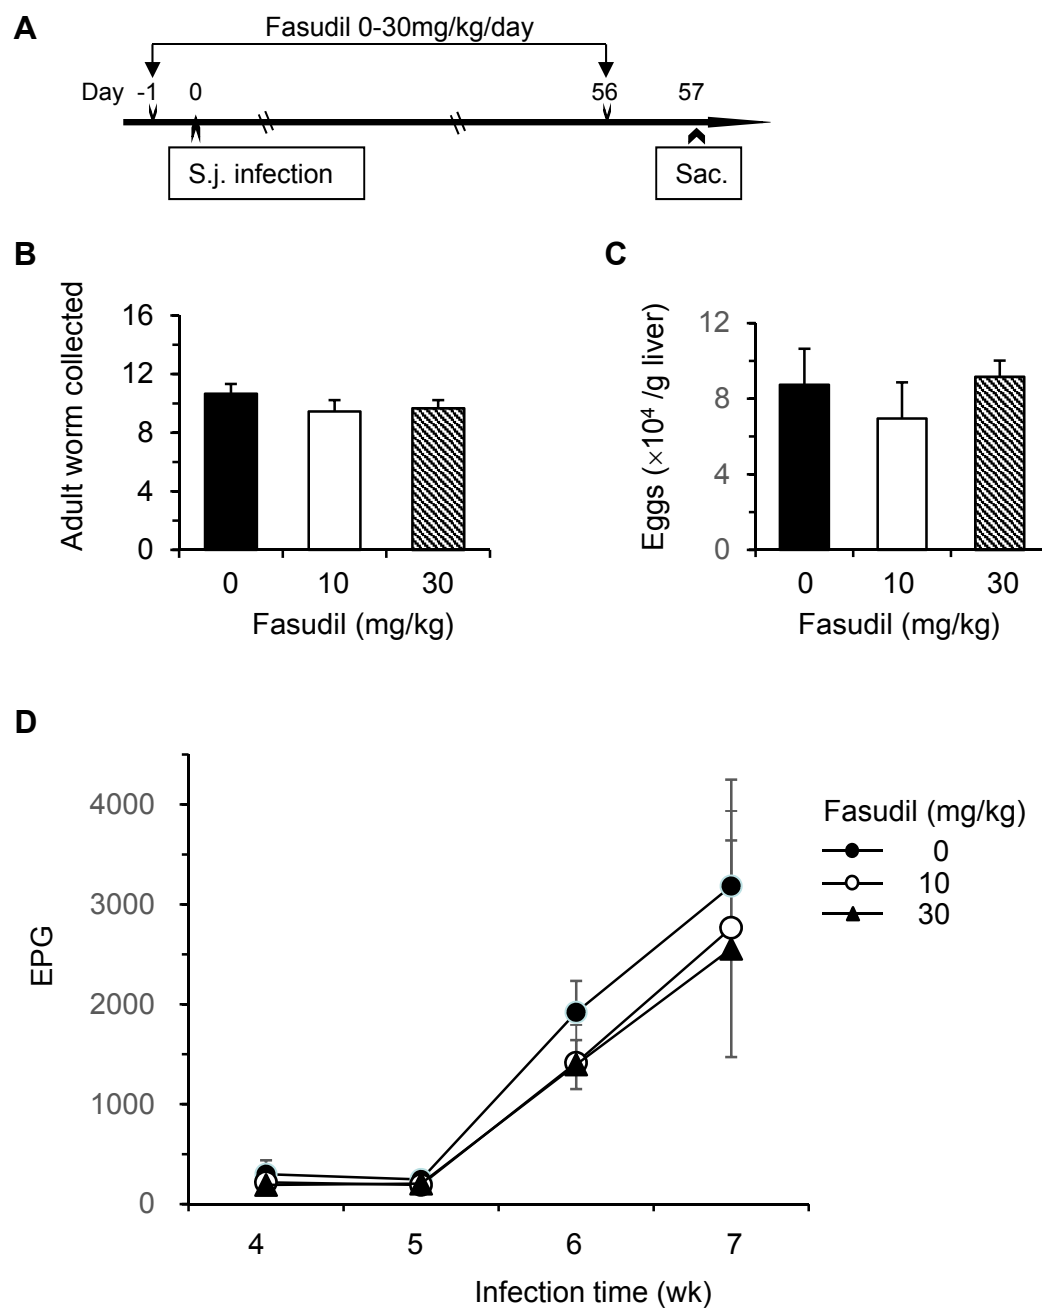

**Figure S1. Fasudil does not affect worm burden by *S. japonicum* infection.**

Mice were infected with *S. japonicum* and injected i.p. with fasudil at 0–30 mg/kg for 8 weeks (d -1~d 56). Mice were sacrificed 24 h after the last injection for worm burden assays (A). Adult worms collected from portal and mesenteric veins per mouse (B), eggs in livers (C) and eggs per gram (EPG) of feces (D) are shown. Results are representative of three independent experiments.
